# Supplementary material for: Genetic and Structural Variation in the Gastric Cancer Kinome Revealed through Targeted Deep Sequencing
Source: Oxford University Press journal article supplement (doi:10.1158/0008-5472.can-10-1749), 2010-11-19
Supplement: 00085472can101749-sup-stab_3.xlsx [file 00085472can101749-sup-stab_3.xlsx]

## Sheet: kinome_poor_coverage_list
Gene name	Accession number	Exon number	Chr	Start	End	GC content
PRKCZ	NM_002744	1	chr1	1971930	1972000	0.71831
PINK1	NM_032409	1	chr1	20832628	20833016	0.755784
EPHA8	NM_020526	1	chr1	22762716	22762808	0.83871
EPHB2	NM_017449	1	chr1	22910064	22910124	0.770492
EPHA10	CGP_EPHA10.1	5	chr1	37991136	37991484	0.793696
MAST2	NM_015112	1	chr1	46042156	46042332	0.785311
ROR1	NM_005012	1	chr1	64012676	64012768	0.817204
MAPKAPK2	NM_032960	1	chr1	204925200	204925472	0.681319
CAMK2G	NM_001222	1	chr10	75304160	75304224	0.630769
STK32C	SU_YANK3	1	chr10	133971064	133971328	0.773585
BRSK2	SU_BRSK2	1	chr11	1368091	1368181	0.67033
WEE1	NM_003390	1	chr11	9552057	9552632	0.758681
ADRBK1	NM_001619	1	chr11	66790748	66790860	0.699115
KIAA0999	SU_QSK	1	chr11	116474072	116474344	0.787546
ACVR1B	NM_020328	1	chr12	50631796	50631884	0.752809
DYRK2	NM_006482	1	chr12	66329180	66329228	0.673469
ULK1	NM_003565	1	chr12	130945504	130945608	0.714286
FLT3	Z26652	1	chr13	27572604	27572648	0.8
PDPK1	NM_002613	1	chr16	2528115	2528138	0.666667
PDPK1	NM_002613	1	chr16	2528115	2528138	0.666667
SMG1	SU_SMG1	28	chr16	18777844	18778004	0.416149
SMG1	SU_SMG1	26	chr16	18779490	18779600	0.351351
SMG1	SU_SMG1	23	chr16	18785444	18785598	0.412903
SMG1	SU_SMG1	22	chr16	18787012	18787176	0.472727
SMG1	SU_SMG1	21	chr16	18787346	18787542	0.416244
SMG1	SU_SMG1	20	chr16	18787928	18788126	0.482412
SMG1	SU_SMG1	15	chr16	18791008	18791168	0.36646
SMG1	SU_SMG1	14	chr16	18791316	18791448	0.466165
SMG1	SU_SMG1	12	chr16	18795954	18796056	0.300971
SMG1	SU_SMG1	11	chr16	18798318	18798542	0.435556
SMG1	SU_SMG1	6	chr16	18808196	18808408	0.41784
SMG1	SU_SMG1	1	chr16	30253796	30253876	0.666667
MAP2K4	NM_003010	1	chr17	11864929	11865043	0.826087
KSR1	SU_KSR1	1	chr17	22807796	22808028	0.716738
MAP3K3	NM_002401	1	chr17	59053852	59053856	0.6
PIP5K1C	NM_012398.1	1	chr19	3651295	3651388	0.776596
INSR	NM_000208	1	chr19	7244803	7244902	0.83
PIK3R2	NM_005027.2	5	chr19	18133088	18133304	0.829493
LMTK3	SU_LMR3	14	chr19	53688764	53689176	0.794189
PRKCE	NM_005400	4	chr2	46059620	46059652	0.484848
PRKCE	NM_005400	5	chr2	46060940	46061024	0.576471
PRKCE	NM_005400	6	chr2	46065192	46065324	0.578947
PRKCE	NM_005400	7	chr2	46082048	46082188	0.531915
PRKCE	NM_005400	8	chr2	46085184	46085280	0.597938
PRKCE	NM_005400	9	chr2	46088104	46088304	0.547264
PRKCE	NM_005400	10	chr2	46090988	46091160	0.479769
PRKCE	NM_005400	11	chr2	46166852	46167004	0.503268
PRKCE	NM_005400	12	chr2	46225736	46225872	0.518248
PRKCE	NM_005400	14	chr2	46240248	46240396	0.543624
PRKCE	NM_005400	15	chr2	46265376	46265524	0.449664
MAP4K4	NM_145686	1	chr2	101680976	101681032	0.614035
STK39	ENST00000263818	1	chr2	168811984	168812192	0.803828
PIK4CA	NM_058004.1	35	chr22	19417260	19417386	0.503937
PIK4CA	NM_058004.1	34	chr22	19418024	19418132	0.559633
PIK4CA	NM_058004.1	33	chr22	19418332	19418482	0.629139
PIK4CA	NM_058004.1	32	chr22	19418684	19418840	0.579618
MAPK1	NM_002745	1	chr22	20551612	20551730	0.747899
BCR	NM_004327	22	chr22	21986740	21986900	0.608696
CHEK2	NM_007194	13	chr22	27415124	27415204	0.444444
PIM3	XM_497821.1	5	chr22	48740376	48740684	0.796117
PIM3	XM_497821.1	6	chr22	48740776	48740888	0.707965
MAPK12	NM_002969	1	chr22	49041940	49042064	0.736
PXK	NM_017771	1	chr3	58293756	58293856	0.663366
EPHB3	NM_004443	1	chr3	185762720	185762832	0.831858
TRIO	NM_007118.2	1	chr5	14196835	14196991	0.808917
FLT4	NM_002020	1	chr5	180009088	180009152	0.723077
CAMK2B	NM_001220	1	chr7	44331480	44331544	0.6
EGFR	NM_005228	1	chr7	55054464	55054552	0.719101
LIMK1	NM_002314.2	1	chr7	73136256	73136312	0.526316
TIF1	AF119042	1	chr7	137795840	137796192	0.764873
HIPK2	NM_022740	1	chr7	139123872	139123888	0.705882
EPHA1	ENST00000275815	1	chr7	142815936	142816016	0.777778
STK3	NM_006281	1	chr8	99906920	99906944	0.68
TGFBR1	NM_004612	1	chr9	100907312	100907408	0.845361
IRAK1	NM_001569	1	chrX	152938320	152938464	0.724138
PRKY	NM_002760	1	chrY	7202354	7202519	0.777108
