# Supplementary material for: Genetic and Structural Variation in the Gastric Cancer Kinome Revealed through Targeted Deep Sequencing
Source: Oxford University Press journal article supplement (doi:10.1158/0008-5472.can-10-1749), 2010-11-19
Supplement: 00085472can101749-sup-stab_11.xlsx [file 00085472can101749-sup-stab_11.xlsx]

## Sheet: Sheet1
Coodinates and Gene	Forward primer (5' to 3')	Reverse primer (5' to 3')
100242064-EPHB4	CTGAGCTAGGGGGAAAAAGC	CGAGGAAAGCTTGGTAGGAC
102535788-CDC42BPB	CTTGGGTGACAGAAGAGCAG	TGTGCACGTAATGAAGCTGA
105083787-NRK	TGGCCAGAAAGATTTTGTGTT	GCCAGAAGGAAAAGGACAGA
105752935-SLK	CATCAATGAGGAACCAGGAA	GGGTATTAGAACAGGCTGAGG
106295510-PIK3CG	AGCTCATCCCCATCGAGTTC	TGACGTCATAGCCAATCAGC
106297103-PIK3CG	CAAAGAATTGCTCTGGCATT	ACACCAACATCCCCTACCTG
107647229-ATM	TGTTCTTGAACTTCTGAAACCA	TGTACCTACCAAAATGCTCCA
108161951-FER	GAAGAATTCACATGAAGCAGTGT	AATCACTGCTTTAGAATGCTGAC
112457027-MERTK	TGTAGCCCCATCAGTAGCAC	GGTGCCTTGCCTAACTCAAT
11449702-BLK	AAACTTGTGGAGGGAGTGCT	CACGCCCCCTCTTACTAGAAT
116447133-KSR2	CTTTGAGCAGCTGGAGATCG	AAGCAGAGTTTTGCCAATCC
117160325-TAOK3	TGTTCCCAAATTGTCATGTG	TGGAGCATGCACTAATTTTCA
118725399-CIT	CTGACGATGACACCTCCAAT	GACTAGCAGCTTCCCTCCAC
11925507-MAP2K4	TGGAAAAATTGCTTCCCAAT	CAACAGTGGTATTACTGCACCA
11925553-MAP2K4	TTGAGTCATCAGGAAAACTGAAG	AACACCCTCAAAGGAGTTGG
120193121-CAMKK2	TCAAGTGATCCTCCCACCTT	ACAAAACCCTCTCCACCAAC
124923711-MYLK	TTCCTGTGCTTCCTCCACAG	TTTCTACAAATGTGCCCTTCC
12906519-CAMK1D	GGCTCTCCTGAGGCTAGGTA	GCAAAATTATTCAGGTGAGGTTC
130507410-PKN3	AAACCCTGTGCGAGTCAGTC	TCTCAGCTCCTCACTCACCA
130520430-PKN3	GCTTGTCCCAGTCTCACTCA	AGGCAGCATCTGTCCTTACC
131892184-PIK3R4	TGTCCTGAGATCAGGGAGATT	TTAGGAGACTTGGGCAGCTT
132551179-NEK11	CATTTTCCTGCAGGTGATCTT	TGCCTAGAGATGGTTCTGGA
132749483-ABL1	AAGAAGAAGACAGCCCCAAC	ACTGACCTCCACTCCGTGTC
132749483-ABL1	AAGAAGAAGACAGCCCCAAC	ACTGACCTCCACTCCGTGTC
135260223-C9orf96	TCATTTGGCATCTTCTGAGC	TCTATTCCAGTCCCCCAGAC
142276877-EPHB6	AGCCATTTTCTGATTCGACA	GCTCTCACCTGAGGACTGTG
1561678-CDC2L1	ACAGGTGCTGGGTTGAGATG	CACTGGGCTCACTTGTTCAT
1625267-CDC2L2	GAGTACGGATCCCCTCTGAA	TGATCTGATCGATTTCCGAAT
1628785-CDC2L2	TCCTAGCTTCGTAATTAGGTTCA	CTCAGCCCCTGTGGTAACTC
16333550-EPHA2	GCTGTAATTTGTGGGGGAAC	TCGTATATCCTCGCACCATC
1640692-CDC2L1	TGCATTTTTCTGGGTTGAAA	TGGGGAAGGCAGAAGAGTAG
17114747-PIK3C2A	TGAAAATTAACCCGGCCTTG	TCAGCAGTTTTACTCCTTGGAA
177973389-CLK4	GCATAACATGGCTTCAGCTC	CATCGGCTAAAACAGAGCAA
179100420-TTN	TGAGATGAAATTTGCAAGCAT	TAGGCGGAATTCCTTTATGG
179112874-TTN	TGATCATTTGCTTTCTGCAA	ATCACCCCTGTCTGCTTCTT
179112888-TTN	TGATCATTTGCTTTCTGCAA	ATCACCCCTGTCTGCTTCTT
179133186-TTN	AGATGGGTGCGTGTAAACAA	CACCATCAAACAGCGGCTTA
179146537-TTN	TATCATGGTTCCCTCCACTG	TGTCACTTCAGGGTTTTTGG
179148600-TTN	CTGGGACCTCCCTCTGATAG	AGGCTGACGGTGCTCTTAGT
179149594-TTN	GGCAGCGAAATTACAGGATA	CTCTGGAATGAACGGTGTTG
179174126-TTN	TGTGGAAACCATTCAGAGGA	CCTCCAGGCTTCTTTCTTTG
179177137-TTN	CCCCAATGGTCAGTATGAGT	AAATTCCACGCCTTTCAATC
179181653-TTN	ATGATGGTGGCAGTGAAATC	CACAATGGGCTTATCTGGTG
179188389-TTN	GGCAATGTGAAGAGAACTGC	AGCCCATTTTAGTGACTAGGAGT
179192637-TTN	TGGAAGTCCAATGGCTAAGA	TAACATGTGGGTAGGGCTTG
179339508-TTN	GGAGGAAACCAGAGCTTCAA	CTTCCTGCCACAAAGGTGTA
179367926-TTN	GAGACAACGCTGACAACCTC	TCATATGCATTTTTCCTCCAA
179979242-FLT4	CGTACAGCTCACCTGCAACT	GAGGGGGAGGGTTACTAAGG
179981257-FLT4	GCCGACAGCTACAAGTACGA	CAAAGGCAGAGGCAGCTACT
180822332-RNASEL	TGTTGACCTGGTCCAGCAAT	TTACCATACACAGCGGCTTC
18526608-CDKL5	CTTGATATTCTGCAATGACTGTG	CATTTAAGCAGCCACCTCCT
185773451-EPHB3	ATTGCACCCGATGAGAGCTT	CCGTTGCAGTAGAGCTTGAG
18735231-SMG1	GGACACTGGTCTTGAACATCC	CAAATTGGAAGATGTGATGAGA
18753896-SMG1	GTTGGGGGTGGTTGTGTTAT	TTCTTCTCCATTCTCATGAAGG
18772450-SMG1	ATCCAGGCAGAATGGAAAGA	TTTATGGAAAATTATAGCCAGCA
19226722-MAPK7	CACTCACTGACTGCCGAGAC	CTCAGTCCAGCCACCTTACC
19299036-MAP3K15	TGAGTGTAGGTTGCCGTGAT	GAAAAGCAACAACTGTTGAATGA
1930811-CSNK1G2	TCTTCGAGAAGCCCGACTAT	CCCAGAGCCTTACTTGGTTT
1930811-CSNK1G2	TCTTCGAGAAGCCCGACTAT	CCCAGAGCCTTACTTGGTTT
19487044-TSSK6	TGTCGGGAGACAAACTTCTG	GGTGATGATCGTGCAGGTAG
196468355-NEK7	TGTGTCGGTGTATGATGAATGA	GCTGATTAAAACTTGGAAATTCA
196555219-NEK7	TTGTAAGATCATTGGCAGCAG	AATGGGGAGGTATGACTTGC
197089731-TNK2	CCTGCATAAGATCGACAAGG	CTTGTCCGGTTCCTCAAAGT
197089731-TNK2	CCTGCATAAGATCGACAAGG	CTTGTCCGGTTCCTCAAAGT
197993974-PAK2	GAGTTGTGGCAGGGGTAGTT	CTCTGTGCCTGAGAATATGGAG
197993974-PAK2	GAGTTGTGGCAGGGGTAGTT	CTCTGTGCCTGAGAATATGGAG
197993974-PAK2	GAGTTGTGGCAGGGGTAGTT	CTCTGTGCCTGAGAATATGGAG
197993974-PAK2	GAGTTGTGGCAGGGGTAGTT	CTCTGTGCCTGAGAATATGGAG
197993974-PAK2	GAGTTGTGGCAGGGGTAGTT	CTCTGTGCCTGAGAATATGGAG
203103765-BMPR2	TTGAAATTCCGATTTCTCTTTTT	TCGCTTATGGCTGCATTATC
203103899-BMPR2	GCAATTTCCCATCGAGATTT	TCCTGAGTCTCACTCACTCTGTC
203762511-PCTK3	AAGCTGAGGGAGTGGGAGTA	GATCCCTGGTGGTGAGAGTG
203767106-PCTK3	ATGGGATTTGACACCAGGTC	GTCAGCCCTCGTTCTTCAGT
204877640-DYRK3	TTTGTATTCAGTGCCAAAATGT	CCTCCTTTCCAAAACAATTCA
204888103-DYRK3	TTATCCACATGCTGGAAAGTT	AAACAGCTGGACCCAAAGTC
213111450-ERBB4	GGGAAATAGCTGCACAGTCC	CAAATGGAAAGAGGGGTGAC
219253599-STK36	TGGCTTCTTTCTCATTCTTATCC	GGGAGTTGGGAATCACTGTT
219272202-STK36	TCTGGACTGCTCAGCCTTCT	GCTGTAGGGTATACCTGATGGA
219272311-STK36	CTGAAGGTTTGGGAGAGGAG	ACTGTCCCTGGGAGAAACAC
220017875-SPEG	CATAAGGGGTGCCTCAGTCT	ACCAGATTAGCTCGAGATGC
220045285-SPEG	CTTGGACCCAGCAGACATTC	CACCAGCATTCCATCAGCTC
220050972-SPEG	CCACAGTGATGGCTGATCTC	ACCAGTCATTTAGGCATGGA
220052798-SPEG	TCTGAAGGCTACTCCACAGG	CTCAGGCTGGAAGACACAAG
220057211-SPEG	AGAACCTTCTGCCACCACAC	TGCTGCTACTGAGACTGCTG
220062679-SPEG	AAACCCCTCCACGAAGACAC	CTCCTCCAGGAAGGTGTAGG
220065637-SPEG	CAGAGCTTCCTTCCAGGTTC	GTAAGAGCCCAGCCAGATGT
225335224-CDC42BPA	CACCTCGAATTCTTGGTCCT	GCTGGTATGGGACATTTGTT
226498670-OBSCN	CTGAATCCCGAATCTTCAGC	CTTTGACCTCCATGCCCACT
226528228-OBSCN	AGCCCCAAATTTCAGAGAGA	CTCACCTTCCACCTGCACTG
226552790-OBSCN	GGCAGAACACAGGAAGACCT	CTGTATCTGCCCCCATCTCT
226625016-OBSCN	GCTGTCACCTCTGACCTCTG	GATGACTCCTGCCTCCTTTC
22788445-EPHA8	GTCAACATCACCACGAACCA	GGGCTAAGCAATTTCATTCC
22788445-EPHA8	GTCAACATCACCACGAACCA	GGGCTAAGCAATTTCATTCC
22788445-EPHA8	GTCAACATCACCACGAACCA	GGGCTAAGCAATTTCATTCC
22934044-KSR1	AGTTGGAGTTCATTGGATGC	GAGACTCATGGGACTTGCTC
23591412-CLK2P	CCAGACCCATGACAACAGAC	GGGAGAAGAAAGGATGCTGA
23591835-CLK2P	GCCTTAGCACCTTCGATTTC	GTGCTATGGTGCTCATGGTC
23743220-STK31	GAAAGTTTGGCTGTTGGTGA	CAGGGATTAGCAAAGGAGAGA
23838281-STK31	TTGTTGAGGGGAGTACCAGA	TCTGGGTTTGGAACTGATTG
24089063-NEK8	AGTCCCCATGCACTGTACCT	AGGAAACGCGAGATGAACTG
241703093-PASK	AGCTTGTGATGGAGAAGCAC	TCCTTCCCAACCTCACTTTC
241714454-PASK	TTACTACTGACCGGCACCTG	GTAGGCACCCTCCTGGATCT
26355362-MYO3A	AGCTTGGGCTGAGCATTTAT	TGTAAGTCCCCATTACCTCCA
26454401-MYO3A	CATTTTTGGGGAGTGACCTC	CCTTGGTGATGAGTCATGCTT
26502788-MYO3A	GAAAATGCAATCTCTGCTAATGA	TGGATCATAGCTTCCTCTTTCTC
26505664-MYO3A	ATGAGAGTCCCCAAGAGTGC	TCCTTCCCATTCAGGAAGTT
27307800-NEK10	TGGCAGGCTGCTATGTAGTC	TGTGGCTATCTCTGTTGGACA
27360822-NEK10	GATGATCTTTGTCTGCACTGG	TCCTTTAATGACATGTTCAATCC
27421821-CHEK2	TGTCTTCTTGGACTGGCAGA	CACCTCCTACCAGTCTGTGC
27561947-MAP3K6	TTTTCCCTAGGAGGAACAGG	GTCAAAAGCCTTGCGATACC
27817682-FLT1	TTGGGTTCGCTATGATAAACC	GACATCAGATCGGGCTTTTT
27877942-FLT1	AACCATGCTGTAAAGCCACA	CAAGTGGACAGTGCCATCTC
29905471-TAOK2	AGCCCAAGAGCCTCAAAGTA	TCCCATGTTTTTGTGGACTG
29905471-TAOK2	AGCCCAAGAGCCTCAAAGTA	TCCCATGTTTTTGTGGACTG
30035555-MAPK3	ACTATGACCCGACGGATGAG	AAGCTTGCTGCTGTATGGAG
30036059-MAPK3	TCTTGTTCTTGCCTTGTTGC	ACGACACCCAAGGTTTATCC
3012119-GRK4	TTGCTTGAACCTGGAAGGTG	CACTCCCAAGGCATGTTTTA
30768019-MAP3K8	CATGAGCACTGGAAGTGACA	TTTGCAAAAGCAAGCAAATC
30768021-MAP3K8	CATGAGCACTGGAAGTGACA	AAAATGCTTTGCAGTGTTGG
32601824-TSSK3	AGAAGTTGGAAGGCAGGAGA	TCAACCATCTGACGGAAGAG
33264650-HIPK3	TTTTTGCAGGTATGGCCTCA	CAGCACTTGTCTGCAATGAA
33802566-IP6K3	CTCTGCTCTGACCGTCCTGT	GCCCCTCTGTGTCTCTCTGT
35125277-ERBB2	GCAGCTCCAAGTGTTTGAGA	GTACTCCCTCAGGCCCAAAG
35125308-ERBB2	GTCCTGTCCCCACTCCTTTA	GGCTATTCTCATCTTCCTCCA
35294891-DCLK1	TGCTGCTTCAGCTTCTGTTC	GGCTAACTGGAAATTAACCTTTC
35598083-DCLK1	GGATAAGGCGCAGAGATACA	GAGCCCATCAATGGTGTAGA
35599054-TESK1	AGCCGGTCAGACCTCTTCCT	TGGCAGTGCTGTCTCCATAC
35599642-TESK1	CCCGTCCTCAATAACAATCC	GTGTCCTGAAGGCCAAAGTT
3584485-PIP5K1C	GGGATTCGCCTCTTTTATGT	GTCCCTGCCTATCCCAGTAG
3604299-PIP5K1C	CAAGATGCACCTCAAGTTCG	TCCGGCCACATTTTAGGTTA
3732619-MATK	ACCAAGTAGAACCCCCAATG	GAGGATTTGCACGTCTTCAG
3734846-MATK	GTAGGGGACAGCAAGTGACC	ACCCGCCCCTCTATCTCTAC
37956642-EPHA10	TCATGGGAGGAGCAGAAGTT	CCCAAGCAGAGGAAGAGAGC
37956642-EPHA10	GTGACCAGCCTTTGTTTCAG	CCCAAGCAGAGGAAGAGAGC
38096040-EIF2AK4	AATCGTAGCATCCCATGTGC	CAAACTGTTGCCAAACCTGT
38285817-BUB1B	CAGGAATTGAACCCTTGAGC	CCTGTAAATCCCCAATCACC
38396231-FGFR1	CCCCTGTACCTGGAGATCAT	CAGAAAATAAGGCCCAAAGC
38405072-FGFR1	GTGTCCGTGTTCATCTGGAA	CATGTGCCCTCCTCTTCCTC
38939549-LRRK2	ACCCATCGTAGGTCAGAAGG	TGTTATCTCTTCCCACAATCAA
38958236-LRRK2	CATGGAACAAAAGGATCAACA	AGACAAAAGTGAGGCCTTGAA
38990567-LRRK2	AGTGAATGTCACGGAAAGCA	ATGGTTTTCCGAAGTTTTGC
39031648-LRRK2	TTGGTGATCTAGTTGGGTTCC	ATGAGAGCTGTCCTCTGTCG
39345913-MAP4K3	AGAAACTGAACTGGCAACCA	GTTGCTTACAACTGGGCAGA
41917259-ULK4	TGGTGTCTTCCTCAGCATCT	CAGACATGCAGCACAAATGA
43364968-SNRK	ATTAGCTCCACAGGGAATGC	AGTGAAGTGAGCCGGTCTTC
44751438-TP53RK	GCTTCAGAGAGCCGAAAAGT	ACTGAGGGAAATCCAGCTTC
45012874-DYRK1B	CAGGATTCGAGCAACAAGAA	GGCACAGGGAAACTAAGTGG
45329220-MYLK3	CTGAGACACCCAGCGAGAAC	CAAGAACAGCCCAGGAACAT
45578426-HIPK4	TGGGACCCCCTACTACTGTC	CTGCTGTAGAAGGCCAGGAT
46244572-MAST2	CCCTGACCATTTTCAGTCCT	AAGCTGAAATCCACATGCAC
46267742-MAST2	GGGTCCTTTTTGCCTCCTTT	TGAACCTCCAGGGTACATGA
46435770-AXL	GAGCTGTGTGACCATCTCGT	CTCCCCAACCCTTCTTACCT
46451351-AXL	GGTTGGGTTGAATTGTCAGG	TCCCTGAAAGGCACTCACAT
47868201-TEC	CCTGGGTTTTCTGGATATGAA	CAGCATATCCTTGGAGAAACA
48689071-TRPM7	CGGATTTTGGATAGTAATGAAGG	CAACTTACAAAGGCCAATGGT
49035685-MAPK12	CCTACTTCGAGTCCCTGCAC	AGGGATGGGGATCTAGGACT
51561400-NEK5	AGCCACTGGTGAATTGTGAA	TCTGTCTCAGAAAACAACAACAA
51607981-NEK3	TCATACAGGTGAATGAAGCAGA	GGGTTTCCAAGGTCACATACA
52244106-TWF2	AGGCCCCATACTCGTCTCTG	CCAGAGTGGGAAATTGAGGT
53686511-LMTK3	TCTGGCTTCCCCCTAATCTG	GGCCGAGGATATGGTACCTG
53710676-PRKG1	CATTCCATTTCTGCACCTCA	CAACATTGAAAAGGAAAACTCAG
54048676-TEX14	TATGCTCCAGCCTGAGTGAC	CCGCTGAAGAAAGAGAAGGT
54048676-TEX14	TATGCTCCAGCCTGAGTGAC	CCGCTGAAGAAAGAGAAGGT
54651240-CDK2	GCCCTATTCCCTGGAGATTC	CCCAGATTTCAGGGTCTCAT
55641026-KDR	GGGTGAGGGTAAAAAGCAAA	CAGGAGGAGAGCTCAGTGTG
55671671-KDR	TGCAGCTACTCAGACCCTCA	GCTCTCACACGAAATGATGC
62293402-CSNK1G1	GCAGACCTGTACTATCCCACTT	ATGTATTCCTTGGCCAGTCC
64358961-CDC42BPG	AGGAGCAGGAGAGCAAGCAG	GTGTCCCCACCTCCAGTAGT
65880352-EPHA5	AGCATTTGCATATTTTTCCTCT	CATCCGCAAAGGTTAACTGA
6588273-ILK	TACATTTGTGTTGCGGGAGT	GGATAGGCACAATCATGTCAA
65886128-MAP2K5	AGGCCCTGGAAAGTACAATG	AACCAGAAGGTATGGGGATG
66955512-RPS6KB2	CCTGGATGCCTCAGTTTCTA	AACCCCCACAGACTCATCTC
68604480-CDK7	CCTGTTTCATTTTTCTTTTTGG	CGTAATTCGAGCACATGGAT
70627391-PIP5K1B	TTAGGAACAACAGCAATAGCAA	AACTGCTTGGGAGAAGGAAA
72707033-CLK3	CTGGTGCAGACTCCTGACCT	CCCCTTGGTCTGAGAAACTC
72708391-CLK3	CTGTCTTGGGAGCTGCTCTT	CCATAGAGCTGGATCAAGGAG
733162-WNK1	AGAGAAGCAGAGCAGCACTC	CTGGTACTGCTGGGGACAGT
7347880-RIOK1	TTCAGTTCACTTGACTTTTGAGG	AGCCATGACGAAATCTTGAA
74457784-RPS6KL1	CACGTGTACCTGGAGCAGAT	GGACAGGGGACAAGACAGAT
74627811-NEK9	TGCTGCATAGCAAAGCTGTC	GGGCCACATATTTTATCCAAG
74637559-NEK9	CCGGAAGCTAATCCATGAAG	ACAGCCATGTGTCCAGAAAG
7517616-TP53	AGGGAGCACTAAGCGAGGTA	CCCAATTGCAGGTAAAACAG
7518255-TP53	ATCCTGGCTAACGGTGAAAC	GGAAGAAATCGGTAAGAGGTG
7519138-TP53	AGTACTCCCCTGCCCTCAAC	GGCCAGACCTAAGAGCAATC
7519227-TP53	CGCATGTTTGTTTCTTTGCT	CTCACCATCGCTATCTGAGC
76580619-TRPM6	CATGACCTACCACGAGAAGC	ACTCAGACCCAGAGCATCAG
76617057-TRPM6	GTGCTTTCTGAAGCCTGATG	TTTCCTCAGATAAGGAGTTTTGC
76709954-AATK	CTCCCTCATCTATGCTCTGC	AGACACCTCGCCACCAGTAG
76709954-AATK	CTCCCTCATCTATGCTCTGC	AGACACCTCGCCACCAGTAG
76719497-AATK	CTTCCTTGACCTGCGAGAAG	GAGCTGAGTCTTCCGGTCTC
76744556-CDKL2	CAACAGAGTGAGACCCTGTCTT	GGAAGACTTTAACCCTAGGTTGG
76749734- CDKL2	GGATGCCAGATTTTACACCA	TCCTATATGCTCCCTACCTTCA
77435241-ADCK1	GGGGAGCAGTTTCCCTTACT	AGACCACCATACCCTGCATT
77469358-ADCK1	GCCAAAGCCACCATCTTTAG	CTCAGAGTGGAGCAGGGAAC
77979971-PCSK5	GACGACTATGGCACAGAGGA	AAGGGGAAGAAAATATGTCAGAA
7848012-GUCY2D	ACAGGTAGGCTCCCTTGCAG	GCTGCAGATTGAGGTCAGAG
7932824-MGC26597	TCTGGCTGTCAATCCACAAT	GTACCACGGCTTTCCAAGAG
80679981-TSHR	GCTTCCTTTGGTGGGAATAA	TCAGAATTGCTGACAGAGCA
83202022-ALPK3	AAGTGGAGCAGGGGGAGAGT	ACAATGGCAGGGACAGTGAG
83202110-ALPK3	CTCTGACACCCACTGTGGAA	CTCACTGGCTCCTTCTGAGG
83208679-ALPK3	GGCTCGGAGCTGAGAATTAC	AAGGTCTGGCATTTCTGCAT
83259075-RPS6KA6	AGTTTTCTGGTCCCATTTTGA	GAAGGGAACAAGACAGTGAGAA
862848-WNK1	TCACACCCAACCTGTGATTT	ATGGGAGTGGTGAACCTACC
862848-WNK1	TCACACCCAACCTGTGATTT	ATGGGAGTGGTGAACCTACC
862848-WNK1	TCACACCCAACCTGTGATTT	ATGGGAGTGGTGAACCTACC
87129868-PSKH2	ACTGATTTTGGAGGCTGGTC	CTTGAGGGTGCCCTAATCAT
87145687-PSKH2	GCCATCGTTACATTGTCCAG	TTCGACTCTTCACCTGGATG
87241268-MAPK10	ACATTTCACTTGATACTGGCTTT	AAAGAGAACATTCCCCTTGG
875747-WNK1	AATCCAGCACCTCAGAGTCC	TCCAAATCCATAAAAGGAGGA
877090-WNK1	GCCAGAAGCATGAAATTGAA	TCAGGAGAGCCAAATTCCTT
88289980-CDK10	GGGTCTCATGTGGTCCTCCT	CTCCTGGTAGTCTCGGGGTA
88979385-PKN2	ATTCCCGAAGTCTTCCGTTT	AATTCCTGCAGCTTGTGATG
89551063-EPHA3	GCAGGTCAAAGGCACAAATA	TGTCCCATAATGCTTGCTTC
91316908-MAP3K7	TGATCAAAGTTGAAATCCAAGAG	TGACGCACCTGTAAACTCAA
92243374-BRDT	GGAACTTGAAACCTACTTTGAGC	TGCTCTGTTAAATCTTTCCCTTG
92666711-SYK	TATGTGTCTTGGGGCCACTT	CAACCCAAATCTGCAATCAG
94024660-EPHA7	AACTCACAGGGCTTTACCAA	TCTTGTAACAACCCCTTCCA
95070981-WNK2	GAAGCCAGCCAAGGTATGAG	CGGAGCTCTTCAACACACAC
95100042-WNK2	ACCCTTCATCCCATGTTCTC	CCTACCTCCCAGGCTCACTC
95100042-WNK2	ACCCTTCATCCCATGTTCTC	CCTACCTCCCAGGCTCACTC
96389168-VRK1	AATGCCAAAAGGTTTTCTCG	TTCAAAAGTTCAAAGCAACCA
97660442-LMTK2	GTGACTGTCCCGGTTGAAAT	GCTGCGTCTTTAGAATTGAGC
97660585-LMTK2	GAGTAGTCTCCCGGAACTGG	GGACATCCACTGACTCCAGA
97661352-LMTK2	TTGCACAACTCCAGTGACCT	GGTACTTCCCTTCGATGTCC
98188958-EPHA6	TGCTGTTCCATTGATACTTTGA	AATTCCGTGGGACTCATCTG
98328076-TRRAP	AATTTGGAACCCTTGGAAGT	TGACTTGGAATTTGGGAGAA
98414453-TRRAP	ATGCTCCAAGGAATTGAACC	TCCTTCCCAAAAGCTGTCTT
98414453-TRRAP	ATGCTCCAAGGAATTGAACC	TCCTTCCCAAAAGCTGTCTT
98430258-TRRAP	AGGGCTGTGTTTGTCAGTTG	AGACAGGGTCTTGTGCAGTG
98430258-TRRAP	AGGGCTGTGTTTGTCAGTTG	AGACAGGGTCTTGTGCAGTG
98794195-EPHA6	TGCATTCCATCCCTTTAATTT	GGGGCCTATCAACTATGAGC
98794196-EPHA6	AAATGCATTCCATCCCTTTA	GGGGCCTATCAACTATGAGC
99385393-LRRK1	TGGAAGATAGTGGGTGGAAAC	ACTGCAGGTCCTCGTAGTCC
99410729-LRRK1	GCTTTGAACCATGACTCTCG	GGGCAGCATATGTCTGAGAA
102998493-MARK3(Splice site)	CTCACCCATGAATTTCTCCA	ACCACTGAGAGAACTGCACAC
18611259-PIK3C2G(Splice site)	AGGCCAGTTTTCAAACTAATGA	CTGGCTTTAAGCAATCATCC
116199280-MET(Splice site)	GTTCGCTACGATGCAAGAGT	GAGCCATGTAATTTTGTGTCAA
86472970-NTRK3(splice site)	CCAGGGATGATGTGGAATAG	GTGATGTGCCATGCATTTTA
TRYO3 deletion (AZ521)	CGTTCGGGGTGACCATGTGG	CCAAGGCCTAAACTGATGCCAG
NEOROD2-ERBB2 fusion (MKN7)	TCCCTGGAGAAGCACTCCTTGGGA	TGACACTGTCTCAGGTCATCGTGC
CDK12-ERBB2 fusion(MKN7)	TGCTGTTGCCAGTTGAAGAAGGCA	TGTGCCACTCTGACCTACAGCCA
GUCY2F deletion(MKN28)	CCGTCATCCAAGATCTGTGGTAGC	CTGAGGTTGCTGCGCGATTAGC
SBK2 deletion (AZ521)	CACGGAAGGCAACCGAGACCCA	ATCGTGACGGCCTACGGCATTGG
